# Supplementary material
Source: Springer Nature journal article supplement (https://www.springermedizin.de/resource/supplementary/12936_2013_3180_MOESM3_ESM.pdf/9545180)

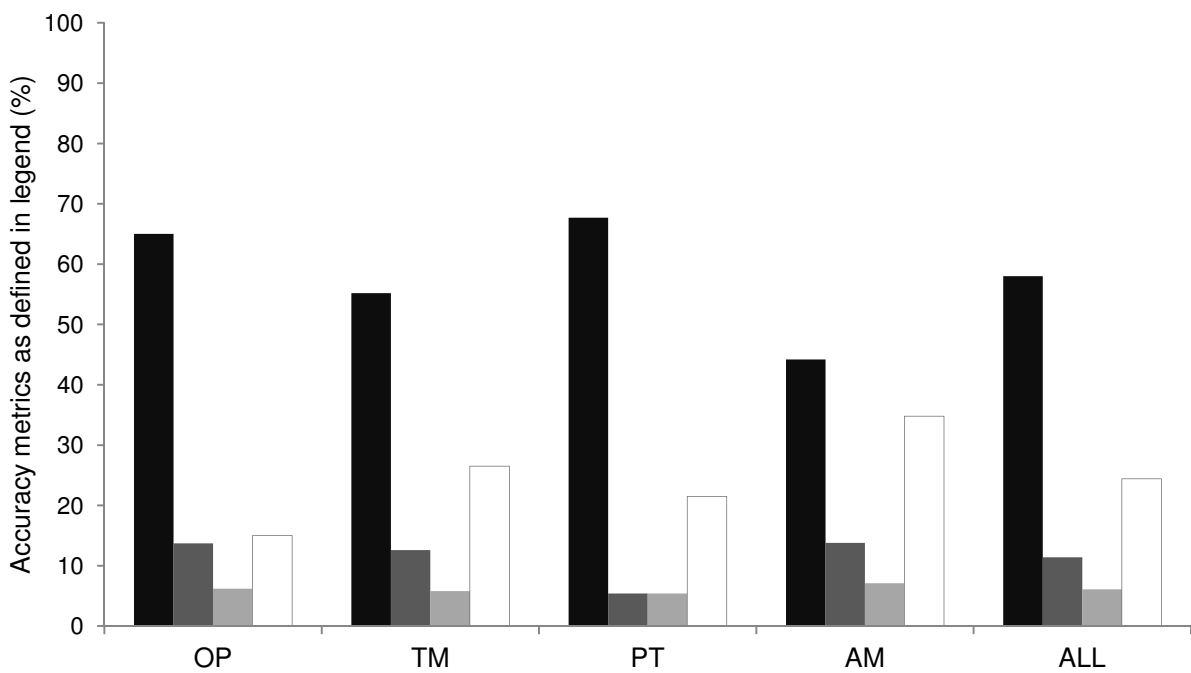

Supplement: MOESM3 [file 9545180]
